# Supplementary material for: Dispersal and fire limit Arctic shrub expansion
Source: Research Square preprint supplement (doi:10.21203/rs.3.rs-1048197/v1), 2021-12-02
Supplement: Supplementary file 1 [file e8e3117fcf0fbdd6d4f2e7e6.docx]

The terrain analysis software RichDEM was used to derive additional topographic conditions from elevation. The R package biomod2 was used to estimate environmental suitability. The image processing software of scipy.ndimage in Python was used to calculate seed arrival probability. Demo code to compute suitability and seed dispersal is publicly available at <https://github.com/YanlanLiu/arctic_shrub_expansion>
